# Supplementary material
Source: bioRxiv or medRxiv preprint supplement (https://www.biorxiv.org/highwire/filestream/60229/field_highwire_adjunct_files/5/197855-4.pdf)

Supplemental Figure 3

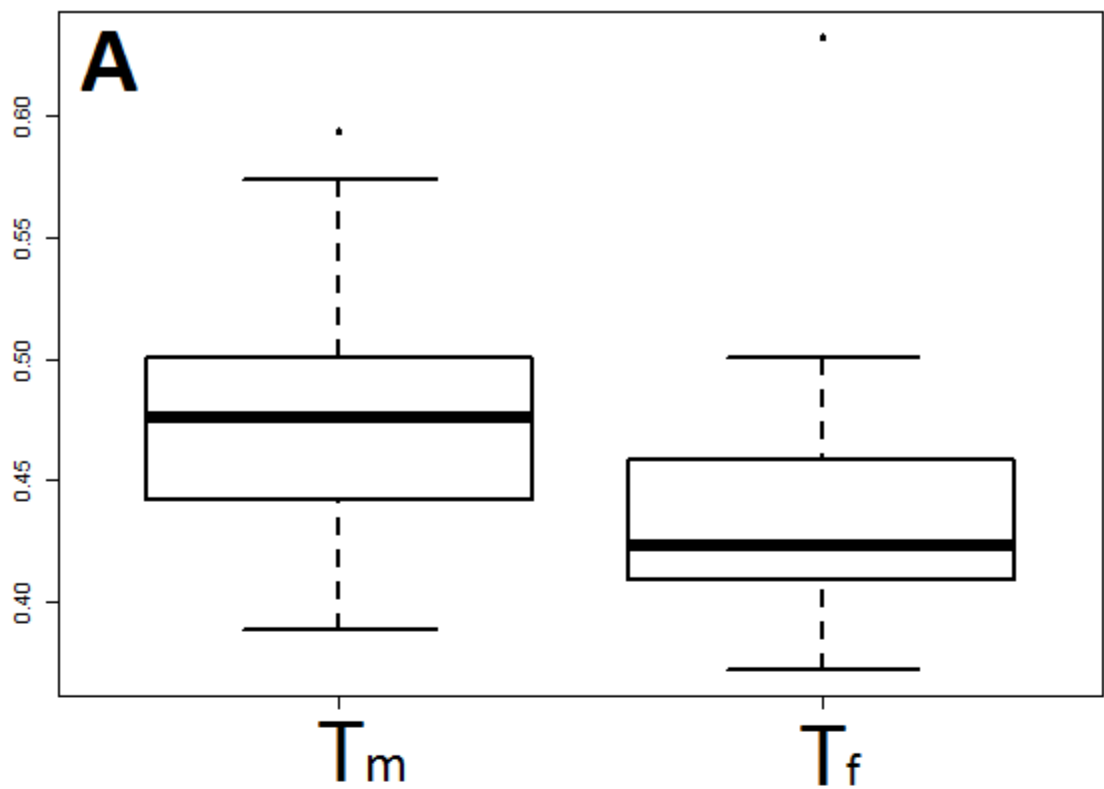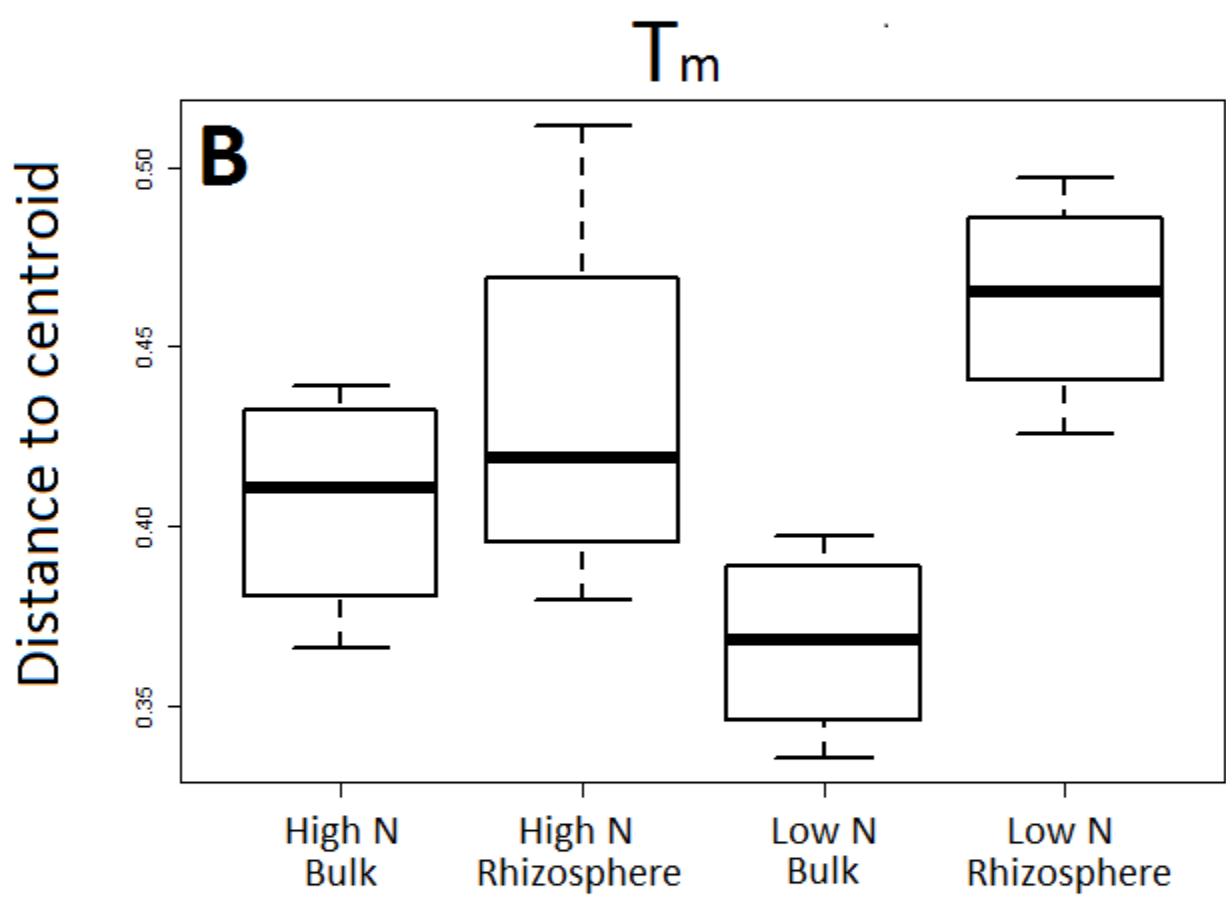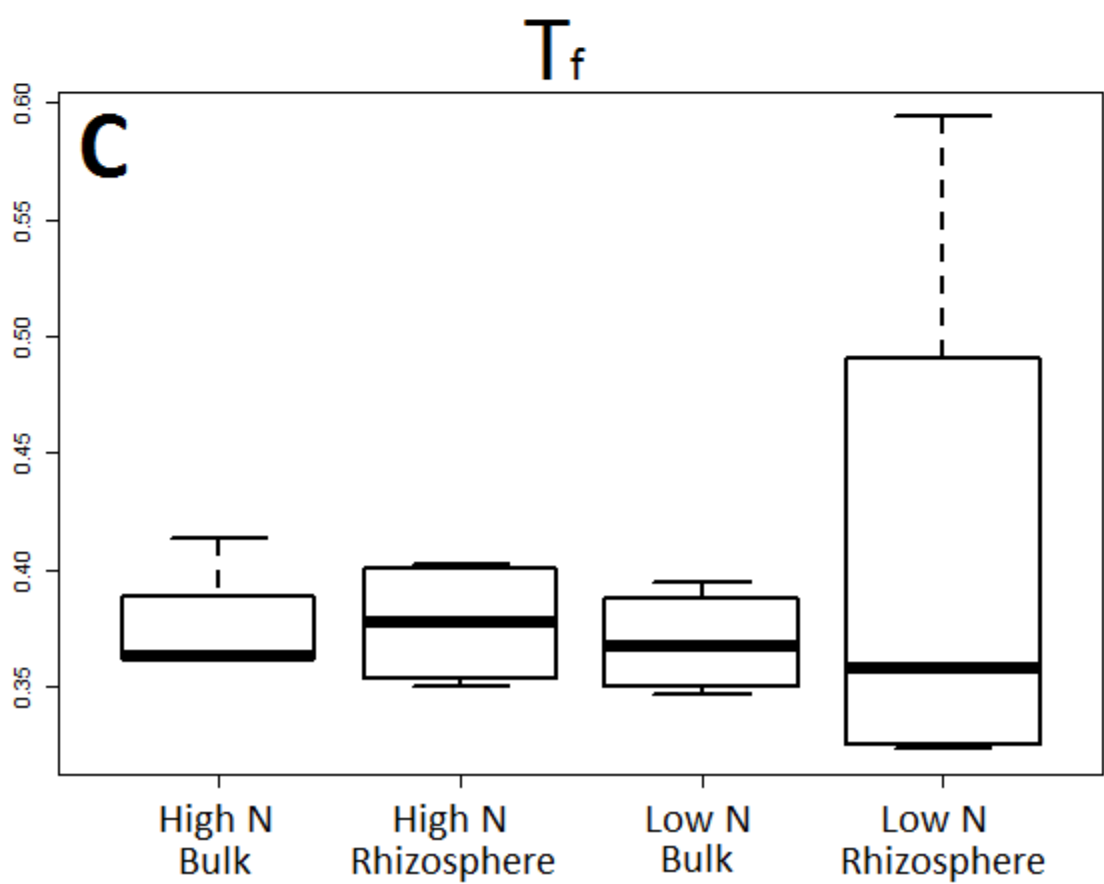

Supplement: Supplementary file [file 197855-4.pdf]
